# Supplementary material for: High Fructose Corn Syrup-Moderate Fat Diet Potentiates Anxio-Depressive Behavior and Alters Ventral Striatal Neuronal Signaling
Source: PubMed Central journal article supplement (PMC8187874; doi:10.3389/fnins.2021.669410), 2021-05-26

## SUPPLEMENTARY FIGURE

**SUPPLEMENTARY FIGURE 1.** HFCS-MFD exhibits higher energy efficiency than CD.

Quantitation of calorie intake and energy efficiency for the two diets are shown. All data are means  $\pm$  S.E.M.; \*\* $p < 0.01$ , unpaired  $t$ -test.

Supplementary Figure 1, Chakraborti, *et al.*

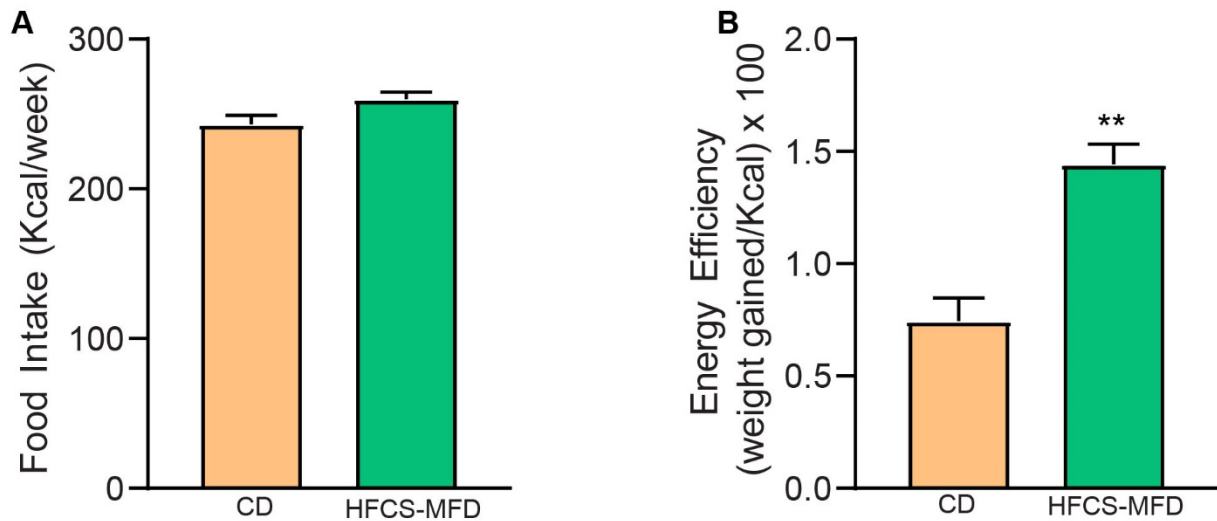

Supplement: Image_1.pdf [file Image_1.pdf]
